# Supplementary material for: In cellulo Evaluation of Phototransformation Quantum Yields in Fluorescent Proteins Used As Markers for Single-Molecule Localization Microscopy
Source: PubMed Central journal article supplement (PMC4051587; doi:10.1371/journal.pone.0098362), 2014-06-10
Supplement: pone.0098362.s003.pdf [file pone.0098362.s003.pdf]

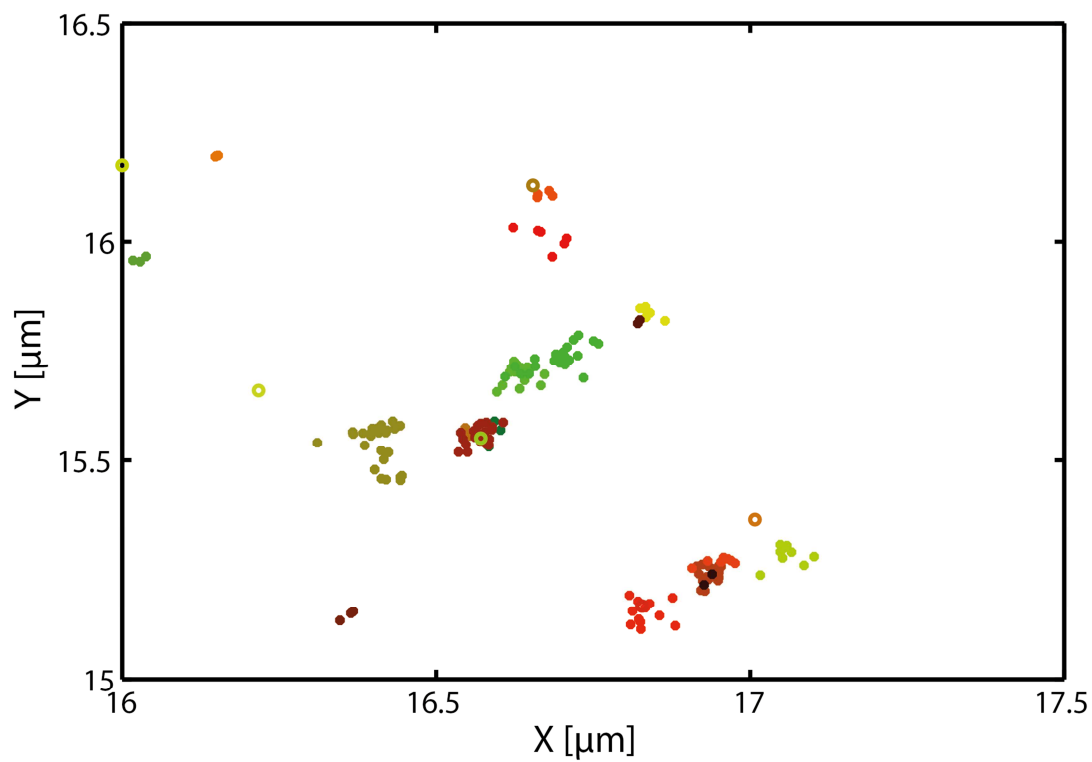

Figure S3: Representative example of spots clustering by the *k-means* algorithm. Groups of localized spots assigned to a single molecule are differently colored. Spatially overlapping groups correspond to single molecules separated in time ( $> 4$  s). Spots with annular shape correspond to single molecules that appeared only once.
