# Supplementary material for: In cellulo Evaluation of Phototransformation Quantum Yields in Fluorescent Proteins Used As Markers for Single-Molecule Localization Microscopy
Source: PubMed Central journal article supplement (PMC4051587; doi:10.1371/journal.pone.0098362), 2014-06-10
Supplement: pone.0098362.s006.pdf [file pone.0098362.s006.pdf]

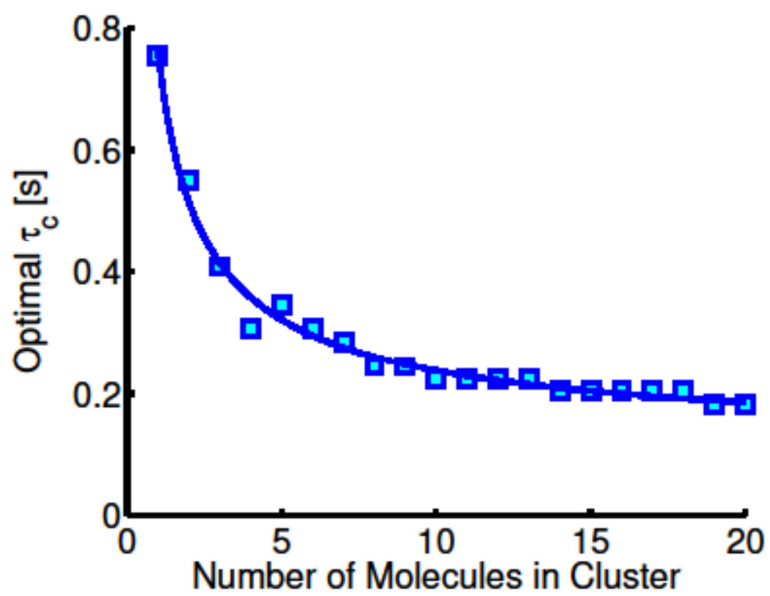

Figure S6: Final  $\tau_c$ -curve extracted from a PALM data set generated with the parameters shown in Table S1.
