# Supplementary material for: In cellulo Evaluation of Phototransformation Quantum Yields in Fluorescent Proteins Used As Markers for Single-Molecule Localization Microscopy
Source: PubMed Central journal article supplement (PMC4051587; doi:10.1371/journal.pone.0098362), 2014-06-10
Supplement: pone.0098362.s009.pdf [file pone.0098362.s009.pdf]

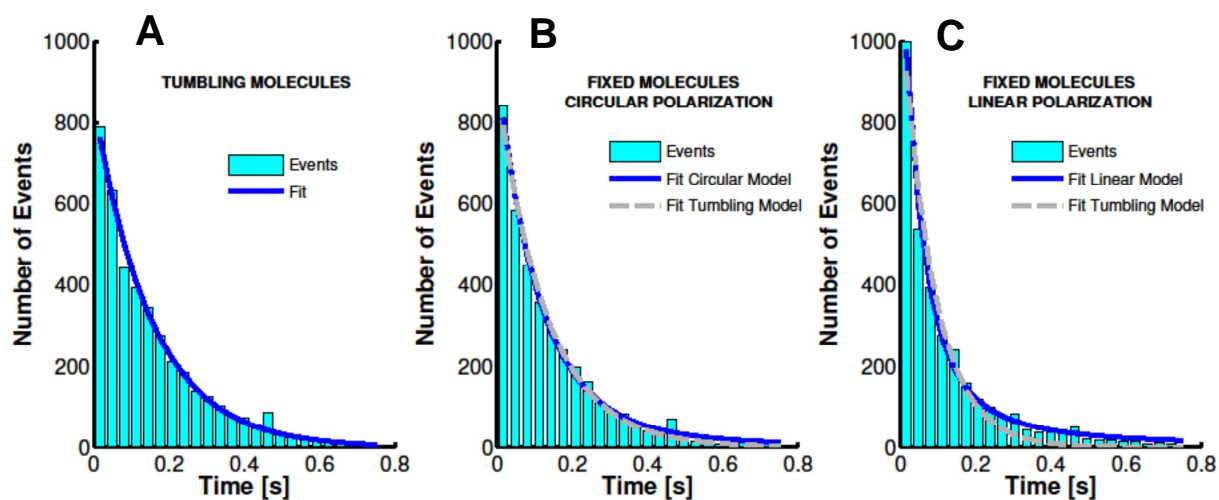

Figure S9: Representative  $N_{bleach}$  histograms for tumbling molecules (**A**), fixed-molecules under circularly polarized laser (**B**), and fixed molecules under linearly polarized laser (**C**). Data were generated with parameters of Table S1. The increase concavity of the histograms in going from tumbling molecules to fixed molecules under a linearly polarized laser is apparent. Fitting histograms from fixed molecules using the tumbling model (grey dashed lines) produces lower quality results.
