# Supplementary material for: In cellulo Evaluation of Phototransformation Quantum Yields in Fluorescent Proteins Used As Markers for Single-Molecule Localization Microscopy
Source: PubMed Central journal article supplement (PMC4051587; doi:10.1371/journal.pone.0098362), 2014-06-10
Supplement: pone.0098362.s010.pdf [file pone.0098362.s010.pdf]

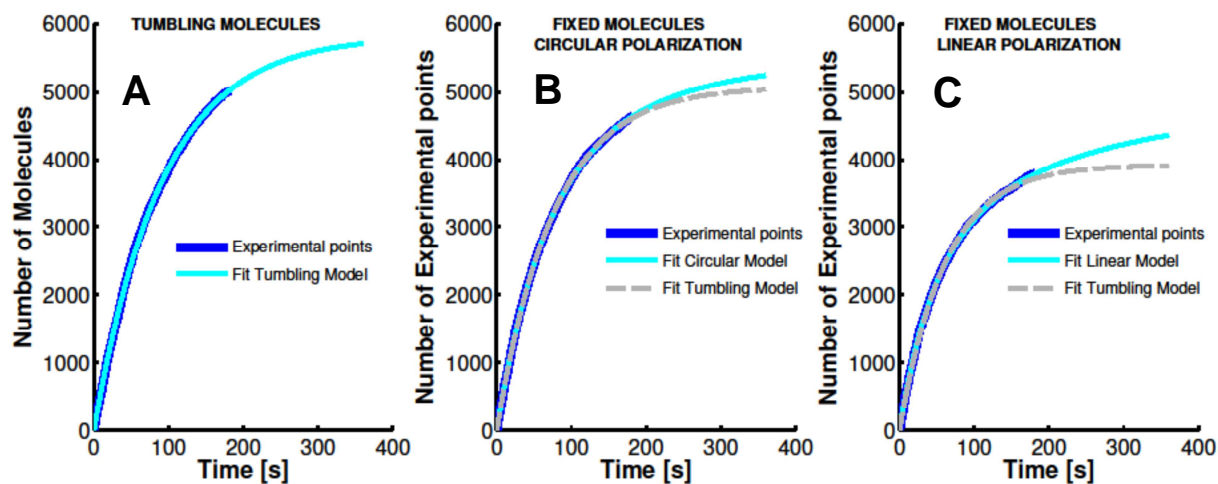

Figure S10: Plots of cumulative activation for tumbling molecules (A), fixed molecules under circularly polarized laser (B), and fixed molecules under linearly polarized laser (C). Data were generated with parameters of Table S1. Fitting activation plots from fixed molecules using the tumbling model (grey dashed lines) produces lower quality results.
