# Supplementary material for: In cellulo Evaluation of Phototransformation Quantum Yields in Fluorescent Proteins Used As Markers for Single-Molecule Localization Microscopy
Source: PubMed Central journal article supplement (PMC4051587; doi:10.1371/journal.pone.0098362), 2014-06-10
Supplement: pone.0098362.s011.pdf [file pone.0098362.s011.pdf]

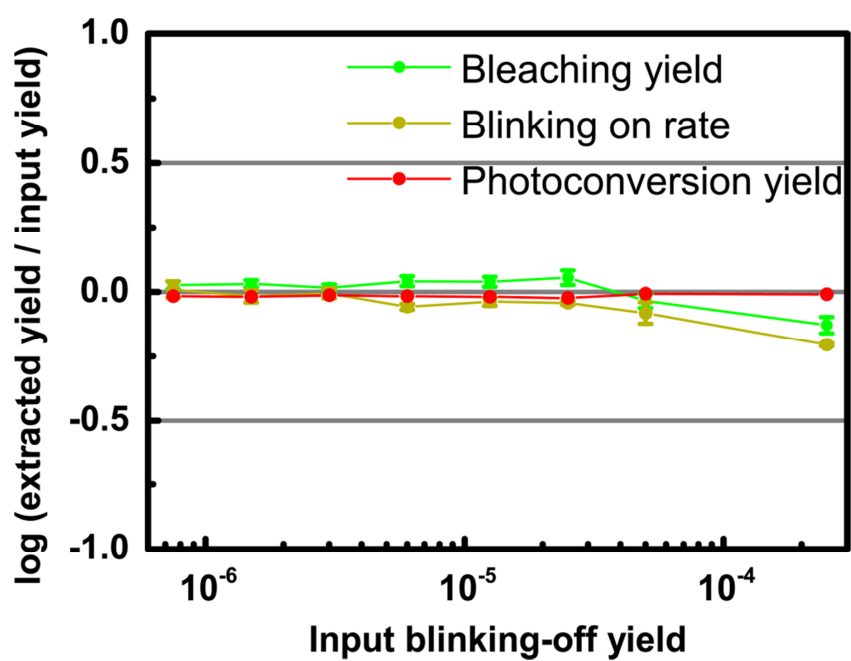

Figure S11: Errors in retrieved photobleaching yield, *on-off* blinking rate and photoconversion yield (or brightness) upon varying the input *off-on* blinking yield.
