# Supplementary material for: In cellulo Evaluation of Phototransformation Quantum Yields in Fluorescent Proteins Used As Markers for Single-Molecule Localization Microscopy
Source: PubMed Central journal article supplement (PMC4051587; doi:10.1371/journal.pone.0098362), 2014-06-10
Supplement: pone.0098362.s013.pdf [file pone.0098362.s013.pdf]

## Appendix S1: Excitation rate of fixed molecules

Let's consider a fluorophore of fixed orientation defined by spherical angles  $\theta$  and  $\varphi$ . We ask what is the rate of excitation of that molecule by a circularly or linearly polarized laser. Let's assume that the excitation rate of a rapidly tumbling molecule is  $k$ .

We start with a linearly polarized laser, of coordinates  $\begin{pmatrix} 1 \\ 0 \\ 0 \end{pmatrix}$ . The fluorophore dipole has coordinates  $\begin{pmatrix} \cos \theta \cos \varphi \\ \cos \theta \sin \varphi \\ \sin \theta \end{pmatrix}$ . The sinus of the angle  $\phi$  between the laser and the fluorophore dipole is given by the vectorial product.

$$\sin^2 \phi = \left| \begin{pmatrix} \cos \theta \cos \varphi \\ \cos \theta \sin \varphi \\ \sin \theta \end{pmatrix} \wedge \begin{pmatrix} 1 \\ 0 \\ 0 \end{pmatrix} \right|^2 = \sin^2 \theta + \cos^2 \theta \sin^2 \varphi$$

$$\text{Therefore: } \cos^2 \phi = 1 - \sin^2 \theta - \cos^2 \theta \sin^2 \varphi = \cos^2 \theta \cos^2 \varphi$$

The rate of excitation of the chromophore is given by:

$$k_{\theta, \varphi} = k' \cos^2 \phi = k' \cos^2 \theta \cos^2 \varphi$$

knowing that  $\langle k_{\theta, \varphi} \rangle = k$  (because the average over a population of randomly oriented fixed molecules is equivalent to a single tumbling molecule). Now:

$$\langle k_{\theta, \varphi} \rangle = \int k_{\theta, \varphi} p(\theta, \varphi) d\theta d\varphi \quad \text{with} \quad \int p(\theta, \varphi) d\theta d\varphi = 1$$

So now comes the question of what is  $p(\theta, \varphi)$  for a random distribution of molecules over half a sphere:

$$\int p(\theta, \varphi) d\theta d\varphi = 1 = \alpha \int \cos(\theta) d\theta d\varphi = \alpha \int_0^{\pi/2} \cos(\theta) d\theta \int_0^{2\pi} d\varphi = 2\pi\alpha$$

Hence:  $\alpha = 1/2\pi$  and  $p(\theta, \varphi) = 1/2\pi \times \cos(\theta)$

Therefore, in order to calculate  $k'$  we have:

$$\langle k_{\theta, \varphi} \rangle = k = 1/2\pi \times k' \int \cos^2(\theta) \cos^2(\varphi) \cos(\theta) d\theta d\varphi$$

$$k = 1/2\pi \times k' \int \cos^2(\theta) \cos(\theta) d\theta \int \cos^2(\varphi) d\varphi$$

The first integral is equal to:

$$\int (1 - \sin^2(\theta)) \cos(\theta) d\theta = \left[ \int_0^{\pi/2} \cos(\theta) d\theta - \int_0^{\pi/2} \sin^2(\theta) \cos(\theta) d\theta \right] = \left[ 1 - \frac{1}{3} [\sin^3(\theta)]_0^{\pi/2} \right] = 2/3$$

The second integral is equal to:

$$\int_0^{2\pi} \cos^2(\varphi) d\varphi = \int_0^{2\pi} \sin^2(\varphi) d\varphi = 1/2 \times \left( \int_0^{2\pi} \cos^2(\varphi) d\varphi + \int_0^{2\pi} \sin^2(\varphi) d\varphi \right) = 1/2 \times 2\pi = \pi$$

Overall:  $k = 1/2\pi \times k' \times 2/3 \times \pi = k'/3$

Thus in the case of a linearly polarized laser:

$$k_{\theta, \varphi} = 3k \cos^2 \theta \cos^2 \varphi$$

In the case of a circularly polarized laser, we have to average over the angle  $\varphi$ , and

$$k_{\theta, \varphi} = 3k \cos^2 \theta \langle \cos^2 \varphi \rangle = 3/2 \times k \cos^2 \theta$$

$$k_{\theta, \varphi} = 3/2 \times k \cos^2 \theta$$
