# Supplementary material for: In cellulo Evaluation of Phototransformation Quantum Yields in Fluorescent Proteins Used As Markers for Single-Molecule Localization Microscopy
Source: PubMed Central journal article supplement (PMC4051587; doi:10.1371/journal.pone.0098362), 2014-06-10
Supplement: pone.0098362.s016.pdf [file pone.0098362.s016.pdf]

Table S1: Parameters used to generate the PALM data set described at the beginning of the Results section of this paper.

|                                          |                        |
|------------------------------------------|------------------------|
| Readout laser power                      | 30 mW                  |
| Readout laser full width at half maximum | 50 $\mu\text{m}$       |
| Readout laser wavelength                 | 561 nm                 |
| Laser polarization                       | Circular               |
| Objective numerical aperture             | 1.49                   |
| Immersion oil index                      | 1.51                   |
| Detection efficiency                     | 4%                     |
| Detector Gain                            | 30 counts/photon       |
| Pixel Size                               | 100 $\times$ 100 nm    |
| Dark noise                               | 2 photons/pixel/frame  |
| Auto fluorescence                        | 10 photons/pixel/frame |
| Frametime                                | 30 ms                  |
| Number of frames                         | 6000                   |
| Molecular density per $\mu\text{m}^2$    | 545                    |
| Fluorescence quantum yield               | 0.55                   |
| Photoconversion brightness               | 4.28 $10^{-4}$         |
| Bleaching yield                          | 5.10 $^{-6}$           |
| Blinking off yield                       | 2.10 $^{-5}$           |
| Blinking on rate                         | 20 s $^{-1}$           |
| Mean signal to noise <sup>#</sup>        | 60.8                   |
| Mean photon output <sup>#</sup>          | 755 photons/molecule   |
| Mean localization precision <sup>#</sup> | 7 nm                   |

<sup>#</sup> Resulting output parameters.
