# Supplementary material for: In cellulo Evaluation of Phototransformation Quantum Yields in Fluorescent Proteins Used As Markers for Single-Molecule Localization Microscopy
Source: PubMed Central journal article supplement (PMC4051587; doi:10.1371/journal.pone.0098362), 2014-06-10
Supplement: pone.0098362.s018.pdf [file pone.0098362.s018.pdf]

**Table S3:** Comparison between phototransformation yields retrieved from simulated data sets with tumbling molecules and fixed molecules (circularly polarized laser and linearly polarized laser).

|                       | True                  | Tumbling                          | Fixed (Circular)                  |                                    | Fixed (Linear)                    |                                    |
|-----------------------|-----------------------|-----------------------------------|-----------------------------------|------------------------------------|-----------------------------------|------------------------------------|
|                       |                       |                                   | Circular model                    | Tumbling model                     | Linear model                      | Tumbling model                     |
| $\phi_{bleach}$       | $2 \times 10^{-5}$    | $(2.01 \pm 0.05) \times 10^{-5}$  | $(2.17 \pm 0.06) 10^{-5}$         | $(2.31 \pm 0.05) \times 10^{-5}$   | $(2.92 \pm 0.11) \times 10^{-5}$  | $(3.65 \pm 0.19) \times 10^{-5}$   |
| $\phi_{on-off}$       | $5 \times 10^{-6}$    | $(3.61 \pm 0.07) \times 10^{-6}$  | $(3.13 \pm 0.20) 10^{-6}$         | $(3.36 \pm 0.17) \times 10^{-6}$ # | $(2.53 \pm 0.32) \times 10^{-6}$  | $(3.18 \pm 0.49) \times 10^{-6}$ # |
| $k_{off-on} [s^{-1}]$ | 20                    | $21.9 \pm 0.66$                   | $23.9 \pm 0.79$                   | $23.9 \pm 0.83$                    | $26.2 \pm 1.20$                   | $26.4 \pm 1.10$                    |
| $N_{mol}$             | 26272                 | $24029 \pm 96$                    | $23308 \pm 140$                   | $19940 \pm 120$                    | $26098 \pm 130$                   | $16022 \pm 128$                    |
| $\Phi_A$              | $4.28 \times 10^{-4}$ | $(4.10 \pm 0.004) \times 10^{-4}$ | $(4.21 \pm 0.006) \times 10^{-4}$ | $(4.89 \pm 0.006) \times 10^{-4}$  | $(3.67 \pm 0.005) \times 10^{-4}$ | $(6.03 \pm 0.008) \times 10^{-4}$  |

Given standard deviations correspond to histogram fitting errors.

# When the model corresponding to tumbling molecules is applied to data sets generated with fixed molecules,  $\phi_{on-off}$  yields values are retrieved that are closer to the true values than when the correct model is used due to compensating errors.
